# Supplementary material for: Thiophene-benzoquinones: synthesis, crystal structures and preliminary coordination chemistry of derived anilate ligands
Source: Royal Society of Chemistry journal article supplement (doi:10.1039/c4ob01582g), 2014-09-08
Supplement: c4ob01582g1.pdf [file c4ob01582g1.pdf]

## **Thiophene-benzoquinones: synthesis, crystal structures and preliminary coordination chemistry of derived anilate ligands**

Matteo Atzori,<sup>a,b</sup> Flavia Pop,<sup>b</sup> Thomas Cauchy,<sup>b</sup> Maria Laura Mercuri<sup>a</sup> and Narcis Avarvari<sup>b,\*</sup>

<sup>a</sup> Dipartimento di Scienze Chimiche e Geologiche, Università degli Studi di Cagliari, S.S. 554 – Bivio per Sestu – I09042 Monserrato (Cagliari), Italy

<sup>b</sup> Laboratoire MOLTECH-Anjou UMR 6200, UFR Sciences, CNRS, Université d'Angers, Bât. K, 2 Bd. Lavoisier, 49045 Angers, France. E-mail: [narcis.avarvari@univ-angers.fr](mailto:narcis.avarvari@univ-angers.fr)

### **SUPPORTING INFORMATION**

## X-Ray structures

### Compound 2a

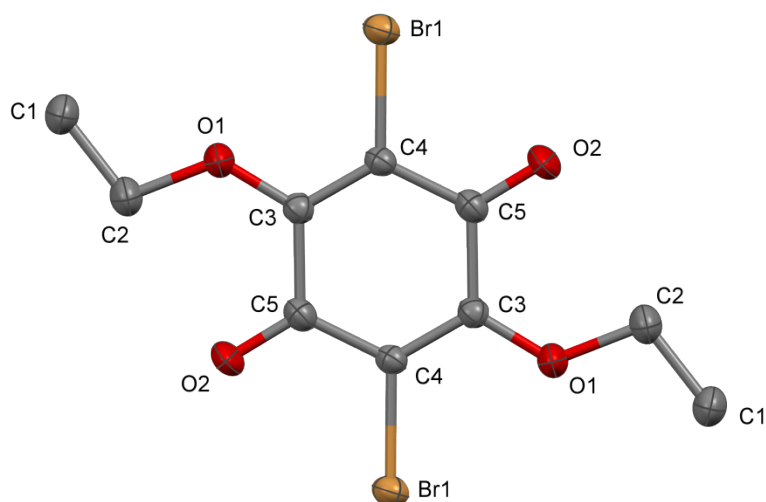

**Figure S1** Ortepe drawing of **2a** with thermal ellipsoids at 30% probability level.

**Table S1** Summary of X-ray crystallographic data for **2a**.

| <b>2a</b>                        |                                                                |
|----------------------------------|----------------------------------------------------------------|
| Empirical formula                | C <sub>10</sub> H <sub>10</sub> Br <sub>2</sub> O <sub>4</sub> |
| Formula weight                   | 354.00                                                         |
| Crystal size, mm                 | 0.2 x 0.05 x 0.02                                              |
| Crystal system                   | Monoclinic                                                     |
| Space group                      | <i>P21/a</i>                                                   |
| <i>a</i> , Å                     | 8.9370(11)                                                     |
| <i>b</i> , Å                     | 5.0321(2)                                                      |
| <i>c</i> , Å                     | 13.3138(12)                                                    |
| $\alpha$ , deg.                  | 90                                                             |
| $\beta$ , deg.                   | 96.958(8)                                                      |
| $\gamma$ , deg.                  | 90                                                             |
| <i>V</i> , Å <sup>3</sup>        | 594.34(9)                                                      |
| <i>Z</i>                         | 2                                                              |
| <i>T</i> , K                     | 293(2)                                                         |
| $\rho$ (calc), Mg/m <sup>3</sup> | 1.978                                                          |
| $\mu$ , mm <sup>-1</sup>         | 6.815                                                          |
| $\theta$ range, deg.             | 4.33 to 26.98 deg                                              |
| GooF                             | 1.091                                                          |
| <i>R</i> 1                       | 0.0357                                                         |
| <i>wR</i> 2                      | 0.0568                                                         |

$$R1 = \frac{\sum |F_o| - |F_c|}{\sum |F_o|}, \quad wR2 = \frac{[\sum [w(F_o^2 - F_c^2)^2] / \sum [w(F_o^2)^2]]^{1/2}}{w}, \quad w = 1 / [\sigma^2(F_o^2) + (aP)^2 + bP], \quad \text{where } P = [\max(F_o^2, 0) + 2F_c^2] / 3.$$

Compound **4a**

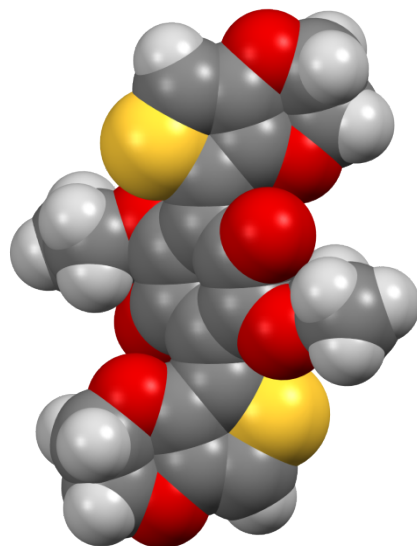

**Figure S2** Molecular structure for the compound **4a** in space filling model; the steric hindrance between the 3,4-ethylenedioxy group and the benzoquinone moiety is highlighted.

## Compound 4b

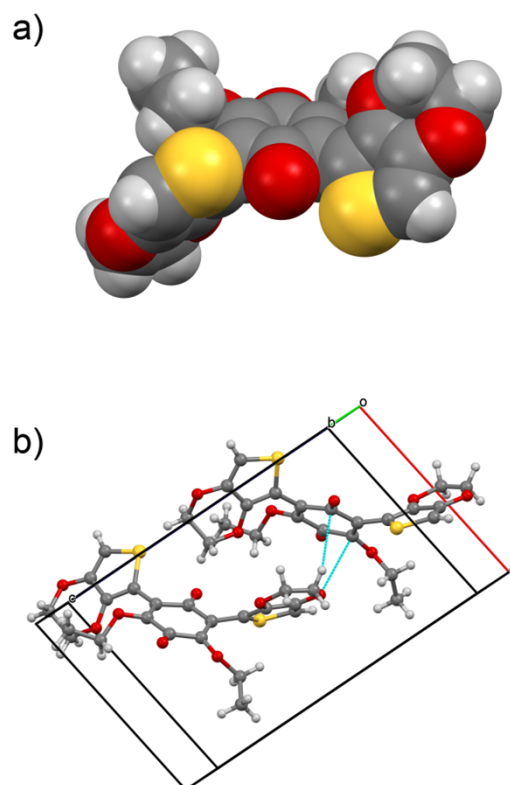

**Figure S3** a) Molecular structure for the compound **4b** in space filling model; b) Stacking interactions between the 3,4-ethylenedioxy fragment and the benzoquinone ring for **4b**: O7...C3 3.19 Å; C18-H...C1 2.86 Å.

**Table S2** Selected bond distances (Å) of the benzoquinone ring for compounds **3a**, **3b**, **4a**, and **4b**.

| Bond | 3a       | 3b       |          | 4a       | 4b       |
|------|----------|----------|----------|----------|----------|
| C=O  | 1.223(4) | 1.218(4) | 1.223(4) | 1.222(2) | 1.226(5) |
|      |          | 1.227(4) | 1.219(4) |          | 1.223(4) |
| C=C  | 1.359(4) | 1.352(5) | 1.368(5) | 1.359(2) | 1.345(5) |
|      |          | 1.346(5) | 1.347(5) |          | 1.343(5) |
| C-O  | 1.334(4) | 1.361(4) | 1.361(4) | 1.342(2) | 1.342(4) |
|      |          | 1.344(4) | 1.342(4) |          | 1.352(4) |
| C-C  | 1.479(4) | 1.482(5) | 1.489(5) | 1.475(2) | 1.484(5) |
|      |          | 1.500(5) | 1.471(5) |          | 1.495(5) |
|      |          | 1.481(5) | 1.505(5) |          | 1.481(5) |
|      |          | 1.500(5) | 1.488(5) |          | 1.489(5) |

## Theoretical calculations

### Computational details

Program and version: Gaussian09 A02; GaussSum 2.2.4; MolIV3D

Property n°1: geometry and electronic structure of fundamental state

Method used: OPT in DFT (functional: PBE0); basis set: 6-311++G(3df,2pd) (1708 primitives gaussians); solvation: one test PCM solvent = acetonitrile

Property n°3: excited states, UV visible absorption

Method used: TD-DFT same details as 1; solvation: one test Non equilibrium LR-PCM solvent = acetonitrile

**Table S3** Frontier orbitals plots for **3a** and **3b** with an isovalue chosen to represent 35% of the function.

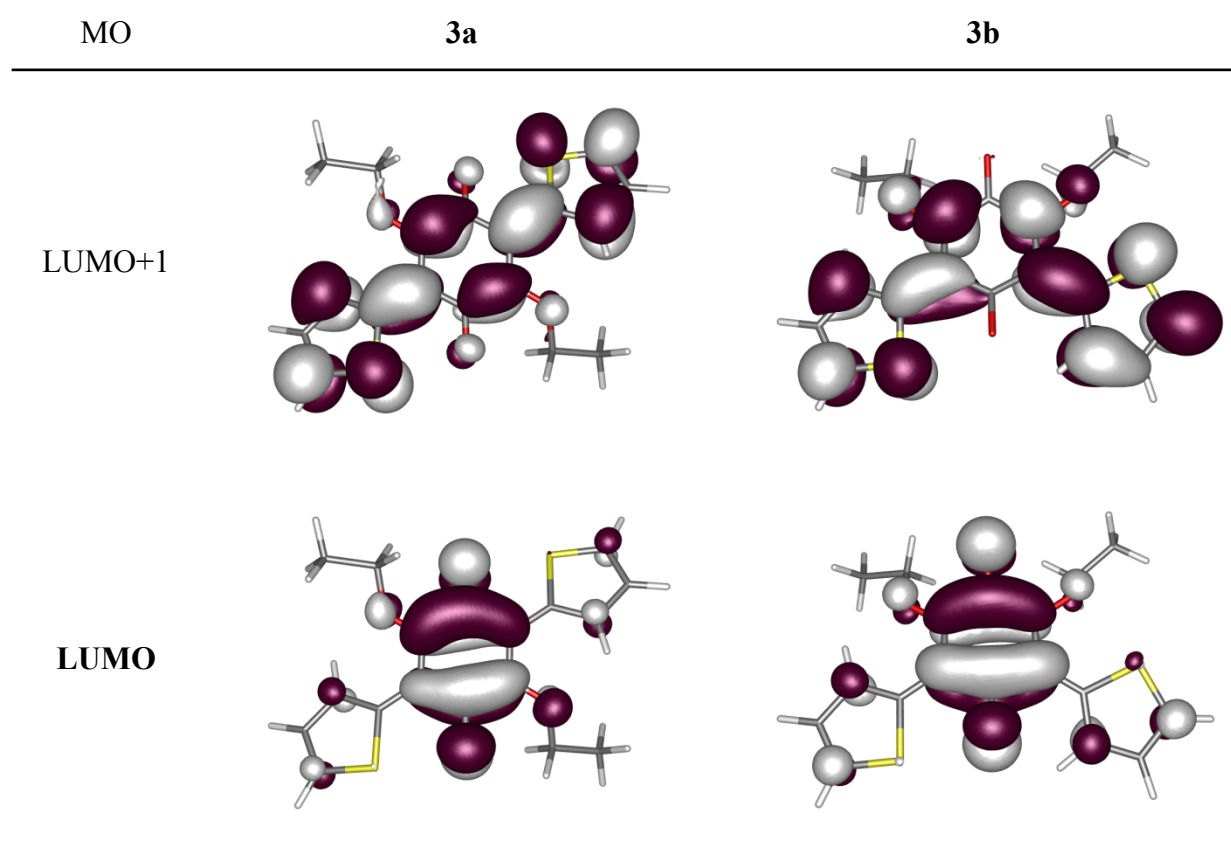

HOMO

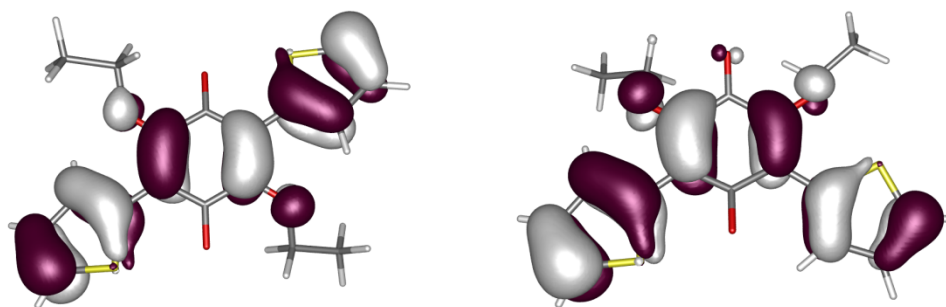

HOMO-1

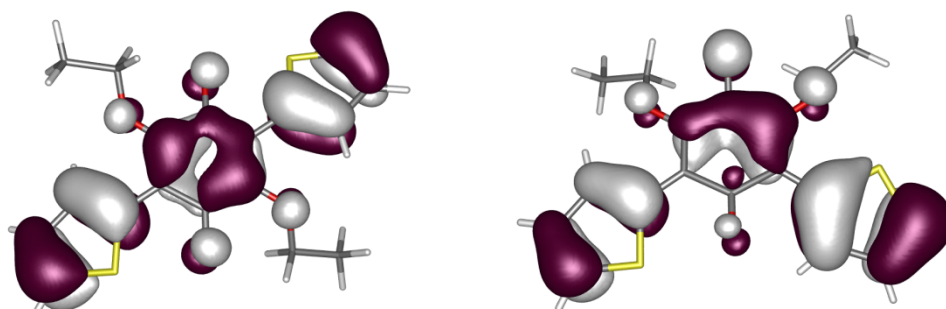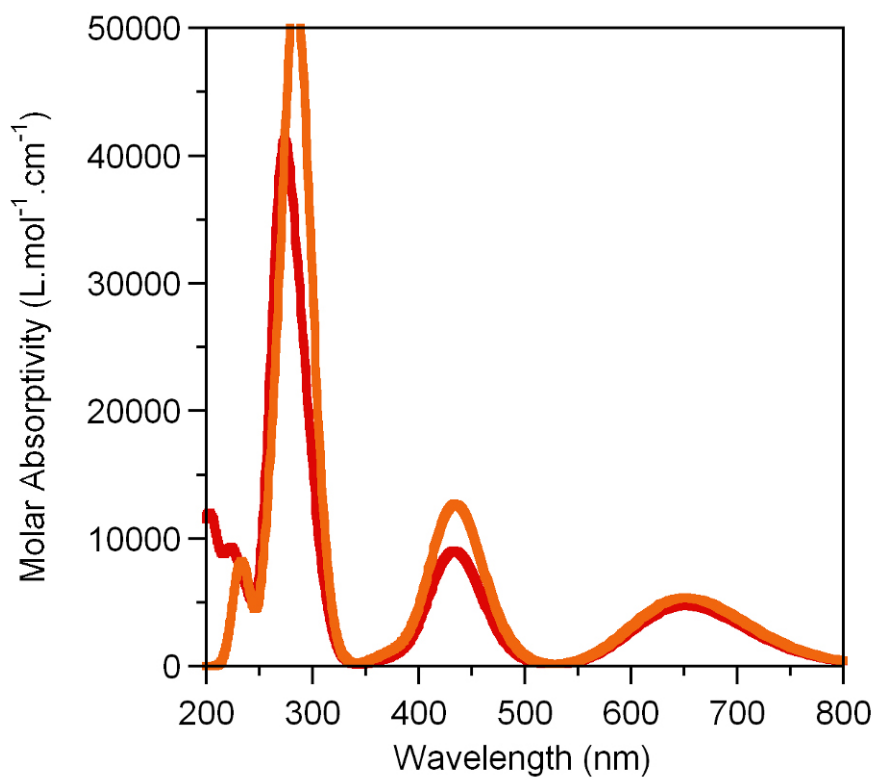

**Figure S4** Comparison between simulated absorption spectra of **3b** in solution (non-equilibrium LR-PCM) (orange line) and in gas phase (red line).

**Table S4** One-electron density difference between the ES and GS. The isocontour value is set to represent 75% of the electron. The solid turquoise (white grid) zones indicate increase (decrease) of density upon electronic transition.

| Excitation<br>(Osc. Str.)        | <b>3a</b> | Excitation<br>(Osc. Str.)                                                                                                | <b>3b</b> |
|----------------------------------|-----------|--------------------------------------------------------------------------------------------------------------------------|-----------|
| $S_0 \rightarrow S_1$<br>(0.000) |           | $S_0 \rightarrow S_1$<br>(0.066)                                                                                         |           |
| $S_0 \rightarrow S_2$<br>(0.122) |           | $S_0 \rightarrow S_2$<br>(0.050)<br>+<br>$S_0 \rightarrow S_4$<br>(0.050)                                                |           |
| $S_0 \rightarrow S_8$<br>(0.612) |           | $S_0 \rightarrow S_8$<br>(0.088)<br>+<br>$S_0 \rightarrow S_{10}$<br>(0.410)<br>+<br>$S_0 \rightarrow S_{12}$<br>(0.071) |           |

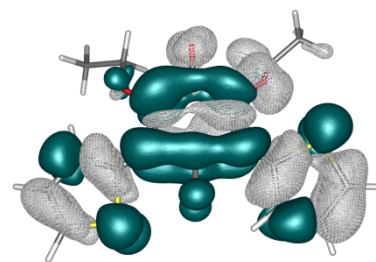

---

$S_0 \rightarrow S_9$   
(0.308)

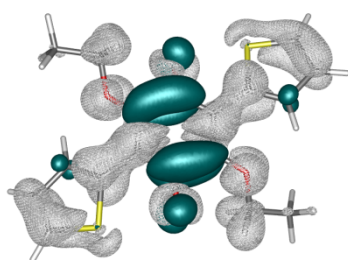

$S_0 \rightarrow S_9$   
(0.161)  
+  
 $S_0 \rightarrow S_{11}$   
(0.122)

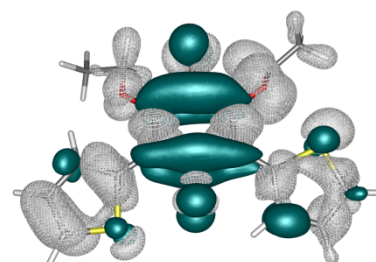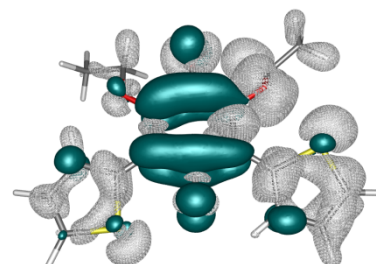

**Compound 3a**



# Table of major excitations with transitions

| Excitation               | Wavelength (nm) | Energy (eV) | Oscillator strength | Transitions |                       |                                                                                                                                                                                                                                                                              |
|--------------------------|-----------------|-------------|---------------------|-------------|-----------------------|------------------------------------------------------------------------------------------------------------------------------------------------------------------------------------------------------------------------------------------------------------------------------|
| $S_0 \rightarrow S_1$    | 676             | 1.83        | 0.000               | 99% HOMO    | $\rightarrow$ LUMO    |                                                                                                                                                                                                                                                                              |
| $S_0 \rightarrow S_2$    | 463             | 2.68        | 0.122               | 90% HOMO-1  | $\rightarrow$ LUMO    | 6% HOMO-5 $\rightarrow$ LUMO                                                                                                                                                                                                                                                 |
| $S_0 \rightarrow S_3$    | 431             | 2.88        | 0.000               | 69% HOMO-4  | $\rightarrow$ LUMO    | -26% HOMO-3 $\rightarrow$ LUMO    3% HOMO-6 $\rightarrow$ LUMO                                                                                                                                                                                                               |
| $S_0 \rightarrow S_4$    | 408             | 3.04        | 0.012               | 53% HOMO-5  | $\rightarrow$ LUMO    | -40% HOMO-2 $\rightarrow$ LUMO    -4% HOMO-1 $\rightarrow$ LUMO                                                                                                                                                                                                              |
| $S_0 \rightarrow S_5$    | 400             | 3.10        | 0.007               | 59% HOMO-2  | $\rightarrow$ LUMO    | 37% HOMO-5 $\rightarrow$ LUMO                                                                                                                                                                                                                                                |
| $S_0 \rightarrow S_8$    | 312             | 3.98        | 0.612               | 82% HOMO    | $\rightarrow$ LUMO+1  | -15% HOMO-7 $\rightarrow$ LUMO                                                                                                                                                                                                                                               |
| $S_0 \rightarrow S_9$    | 284             | 4.37        | 0.308               | 76% HOMO-7  | $\rightarrow$ LUMO    | 13% HOMO $\rightarrow$ LUMO+1    3% HOMO-9 $\rightarrow$ LUMO<br>2% HOMO-1 $\rightarrow$ LUMO                                                                                                                                                                                |
| $S_0 \rightarrow S_{13}$ | 244             | 5.08        | 0.044               | 84% HOMO-3  | $\rightarrow$ LUMO+1  | 5% HOMO-9 $\rightarrow$ LUMO    -5% HOMO-4 $\rightarrow$ LUMO+1                                                                                                                                                                                                              |
| $S_0 \rightarrow S_{16}$ | 237             | 5.24        | 0.054               | 55% HOMO-9  | $\rightarrow$ LUMO    | -21% HOMO-4 $\rightarrow$ LUMO+1    -8% HOMO-3 $\rightarrow$ LUMO+1<br>6% HOMO-11 $\rightarrow$ LUMO    3% HOMO-12 $\rightarrow$ LUMO                                                                                                                                        |
| $S_0 \rightarrow S_{21}$ | 224             | 5.53        | 0.027               | 72% HOMO    | $\rightarrow$ LUMO+5  | -13% HOMO $\rightarrow$ LUMO+7    4% HOMO $\rightarrow$ LUMO+4<br>-3% HOMO-1 $\rightarrow$ LUMO+3    2% HOMO-1 $\rightarrow$ LUMO+6                                                                                                                                          |
| $S_0 \rightarrow S_{24}$ | 222             | 5.57        | 0.108               | 66% HOMO    | $\rightarrow$ LUMO+7  | 12% HOMO $\rightarrow$ LUMO+5    5% HOMO $\rightarrow$ LUMO+4<br>-3% HOMO-12 $\rightarrow$ LUMO    -3% HOMO-9 $\rightarrow$ LUMO                                                                                                                                             |
| $S_0 \rightarrow S_{30}$ | 212             | 5.86        | 0.058               | 52% HOMO-12 | $\rightarrow$ LUMO    | -21% HOMO-6 $\rightarrow$ LUMO+1    -7% HOMO $\rightarrow$ LUMO+11<br>4% HOMO $\rightarrow$ LUMO+9    3% HOMO $\rightarrow$ LUMO+7                                                                                                                                           |
| $S_0 \rightarrow S_{32}$ | 210             | 5.91        | 0.022               | 53% HOMO    | $\rightarrow$ LUMO+11 | 28% HOMO $\rightarrow$ LUMO+9    5% HOMO-12 $\rightarrow$ LUMO<br>3% HOMO-2 $\rightarrow$ LUMO+2                                                                                                                                                                             |
| $S_0 \rightarrow S_{37}$ | 203             | 6.10        | 0.034               | 60% HOMO-6  | $\rightarrow$ LUMO+1  | -13% HOMO $\rightarrow$ LUMO+11    6% HOMO $\rightarrow$ LUMO+9<br>5% HOMO-12 $\rightarrow$ LUMO                                                                                                                                                                             |
| $S_0 \rightarrow S_{39}$ | 201             | 6.15        | 0.030               | 48% HOMO    | $\rightarrow$ LUMO+14 | -24% HOMO-2 $\rightarrow$ LUMO+2    -8% HOMO-1 $\rightarrow$ LUMO+6<br>4% HOMO $\rightarrow$ LUMO+11    -3% HOMO $\rightarrow$ LUMO+22    2% HOMO-6 $\rightarrow$ LUMO+1                                                                                                     |
| $S_0 \rightarrow S_{41}$ | 201             | 6.17        | 0.038               | 19% HOMO-2  | $\rightarrow$ LUMO+2  | 19% HOMO $\rightarrow$ LUMO+16    -15% HOMO-1 $\rightarrow$ LUMO+6<br>10% HOMO-1 $\rightarrow$ LUMO+8    9% HOMO $\rightarrow$ LUMO+14    7% HOMO-1 $\rightarrow$ LUMO+3<br>-5% HOMO $\rightarrow$ LUMO+11    4% HOMO $\rightarrow$ LUMO+13    4% HOMO $\rightarrow$ LUMO+17 |
| $S_0 \rightarrow S_{45}$ | 197             | 6.29        | 0.090               | 24% HOMO-2  | $\rightarrow$ LUMO+2  | 19% HOMO $\rightarrow$ LUMO+14    -13% HOMO-1 $\rightarrow$ LUMO+8<br>-12% HOMO $\rightarrow$ LUMO+13    -6% HOMO-2 $\rightarrow$ LUMO+3    6% HOMO-1 $\rightarrow$ LUMO+6<br>-5% HOMO $\rightarrow$ LUMO+17                                                                 |
| $S_0 \rightarrow S_{50}$ | 192             | 6.46        | 0.035               | 23% HOMO-5  | $\rightarrow$ LUMO+2  | 20% HOMO $\rightarrow$ LUMO+16    -18% HOMO $\rightarrow$ LUMO+17<br>15% HOMO-4 $\rightarrow$ LUMO+7    -4% HOMO-3 $\rightarrow$ LUMO+7    -3% HOMO-8 $\rightarrow$ LUMO+1<br>-3% HOMO $\rightarrow$ LUMO+14                                                                 |

Compound 3b

# Table of major excitations with transitions

| Excitation               | Wavelength (nm) | Energy (eV) | Oscillator strength | Transitions |                       |                                  |
|--------------------------|-----------------|-------------|---------------------|-------------|-----------------------|----------------------------------|
| $S_0 \rightarrow S_1$    | 652             | 1.90        | 0.066               | 98% HOMO    | $\rightarrow$ LUMO    |                                  |
| $S_0 \rightarrow S_2$    | 440             | 2.82        | 0.050               | 44% HOMO-1  | $\rightarrow$ LUMO    | -30% HOMO-5 $\rightarrow$ LUMO   |
|                          |                 |             |                     | 8% HOMO-4   | $\rightarrow$ LUMO    | -3% HOMO-3 $\rightarrow$ LUMO    |
| $S_0 \rightarrow S_3$    | 432             | 2.87        | 0.026               | 35% HOMO-2  | $\rightarrow$ LUMO    | 28% HOMO-4 $\rightarrow$ LUMO    |
|                          |                 |             |                     | 13% HOMO-5  | $\rightarrow$ LUMO    | 3% HOMO-3 $\rightarrow$ LUMO     |
| $S_0 \rightarrow S_4$    | 429             | 2.89        | 0.050               | 49% HOMO-4  | $\rightarrow$ LUMO    | -34% HOMO-1 $\rightarrow$ LUMO   |
|                          |                 |             |                     |             |                       | -10% HOMO-5 $\rightarrow$ LUMO   |
| $S_0 \rightarrow S_5$    | 395             | 3.14        | 0.003               | 50% HOMO-2  | $\rightarrow$ LUMO    | -23% HOMO-5 $\rightarrow$ LUMO   |
|                          |                 |             |                     | -5% HOMO-4  | $\rightarrow$ LUMO    | -20% HOMO-3 $\rightarrow$ LUMO   |
| $S_0 \rightarrow S_7$    | 306             | 4.05        | 0.041               | 79% HOMO-6  | $\rightarrow$ LUMO    | 9% HOMO-7 $\rightarrow$ LUMO     |
|                          |                 |             |                     | -2% HOMO-4  | $\rightarrow$ LUMO    | 7% HOMO $\rightarrow$ LUMO+1     |
| $S_0 \rightarrow S_8$    | 293             | 4.23        | 0.088               | 48% HOMO-7  | $\rightarrow$ LUMO    | -45% HOMO $\rightarrow$ LUMO+1   |
| $S_0 \rightarrow S_9$    | 288             | 4.30        | 0.161               | 37% HOMO    | $\rightarrow$ LUMO+1  | 27% HOMO-8 $\rightarrow$ LUMO    |
|                          |                 |             |                     | -12% HOMO-6 | $\rightarrow$ LUMO    | 20% HOMO-7 $\rightarrow$ LUMO    |
| $S_0 \rightarrow S_{10}$ | 274             | 4.53        | 0.410               | 88% HOMO    | $\rightarrow$ LUMO+2  | 7% HOMO-1 $\rightarrow$ LUMO+1   |
| $S_0 \rightarrow S_{11}$ | 263             | 4.71        | 0.122               | 43% HOMO-8  | $\rightarrow$ LUMO    | 24% HOMO-1 $\rightarrow$ LUMO+1  |
|                          |                 |             |                     | -5% HOMO    | $\rightarrow$ LUMO+1  | -13% HOMO-7 $\rightarrow$ LUMO   |
|                          |                 |             |                     |             |                       | 3% HOMO-9 $\rightarrow$ LUMO     |
|                          |                 |             |                     |             |                       | 3% HOMO-6 $\rightarrow$ LUMO     |
| $S_0 \rightarrow S_{12}$ | 261             | 4.76        | 0.071               | 66% HOMO-1  | $\rightarrow$ LUMO+1  | -15% HOMO-8 $\rightarrow$ LUMO   |
|                          |                 |             |                     | 4% HOMO-7   | $\rightarrow$ LUMO    | -8% HOMO $\rightarrow$ LUMO+2    |
| $S_0 \rightarrow S_{17}$ | 234             | 5.31        | 0.021               | 72% HOMO-3  | $\rightarrow$ LUMO+1  | -5% HOMO-1 $\rightarrow$ LUMO+2  |
|                          |                 |             |                     | 2% HOMO-5   | $\rightarrow$ LUMO+1  | -4% HOMO-2 $\rightarrow$ LUMO+1  |
|                          |                 |             |                     |             |                       | 2% HOMO-3 $\rightarrow$ LUMO+2   |
| $S_0 \rightarrow S_{23}$ | 224             | 5.54        | 0.043               | 48% HOMO    | $\rightarrow$ LUMO+6  | -22% HOMO-5 $\rightarrow$ LUMO+1 |
|                          |                 |             |                     | 4% HOMO     | $\rightarrow$ LUMO+7  | 7% HOMO-3 $\rightarrow$ LUMO+1   |
|                          |                 |             |                     |             |                       | 3% HOMO $\rightarrow$ LUMO+5     |
| $S_0 \rightarrow S_{26}$ | 219             | 5.66        | 0.020               | 74% HOMO    | $\rightarrow$ LUMO+7  | -5% HOMO $\rightarrow$ LUMO+6    |
|                          |                 |             |                     | -2% HOMO    | $\rightarrow$ LUMO+8  | 3% HOMO $\rightarrow$ LUMO+3     |
| $S_0 \rightarrow S_{34}$ | 207             | 6.00        | 0.053               | 23% HOMO    | $\rightarrow$ LUMO+10 | 15% HOMO-3 $\rightarrow$ LUMO+2  |
|                          |                 |             |                     | -9% HOMO    | $\rightarrow$ LUMO+9  | 9% HOMO-2 $\rightarrow$ LUMO+2   |
|                          |                 |             |                     | 6% HOMO-1   | $\rightarrow$ LUMO+4  | 7% HOMO $\rightarrow$ LUMO+11    |
|                          |                 |             |                     |             |                       | -6% HOMO-4 $\rightarrow$ LUMO+2  |
|                          |                 |             |                     |             |                       | -5% HOMO-6 $\rightarrow$ LUMO+1  |
|                          |                 |             |                     |             |                       | -3% HOMO-5 $\rightarrow$ LUMO+2  |
| $S_0 \rightarrow S_{42}$ | 199             | 6.23        | 0.041               | 35% HOMO-6  | $\rightarrow$ LUMO+1  | -14% HOMO $\rightarrow$ LUMO+13  |
|                          |                 |             |                     | -5% HOMO-14 | $\rightarrow$ LUMO    | -8% HOMO $\rightarrow$ LUMO+14   |
|                          |                 |             |                     | 4% HOMO     | $\rightarrow$ LUMO+10 | -4% HOMO-7 $\rightarrow$ LUMO+1  |
|                          |                 |             |                     |             |                       | 4% HOMO-1 $\rightarrow$ LUMO+5   |
|                          |                 |             |                     |             |                       | 4% HOMO $\rightarrow$ LUMO+11    |
|                          |                 |             |                     |             |                       | -2% HOMO-13 $\rightarrow$ LUMO   |
| $S_0 \rightarrow S_{49}$ | 193             | 6.42        | 0.028               | 37% HOMO-7  | $\rightarrow$ LUMO+1  | 18% HOMO-1 $\rightarrow$ LUMO+7  |
|                          |                 |             |                     | -5% HOMO    | $\rightarrow$ LUMO+15 | 6% HOMO-15 $\rightarrow$ LUMO    |
|                          |                 |             |                     |             |                       | -5% HOMO $\rightarrow$ LUMO+16   |
|                          |                 |             |                     |             |                       | 3% HOMO-8 $\rightarrow$ LUMO+1   |
|                          |                 |             |                     |             |                       | 3% HOMO-6 $\rightarrow$ LUMO+1   |
|                          |                 |             |                     |             |                       | -3% HOMO-1 $\rightarrow$ LUMO+6  |

**Electrochemical studies.** Cyclic voltammetry was carried out on a BioLogic potentiostat model SP-150, using a three-electrode cell equipped with a platinum millielectrode with a surface area of 0.126 cm<sup>2</sup>, an Ag/Ag<sup>+</sup> pseudoreference and a platinum-wire as counterelectrode. The experiments were performed at room temperature (25 °C), in dry and Nitrogen-degassed CH<sub>3</sub>CN solution containing 0.1 mol dm<sup>-3</sup> [(*n*-Bu)<sub>4</sub>N]PF<sub>6</sub> as supporting electrolyte, at 100 mV s<sup>-1</sup> scan rate. All the voltammograms were corrected for the half-wave potential of the ferrocene-ferrocenium couple as internal standard (0.42 V under these conditions).

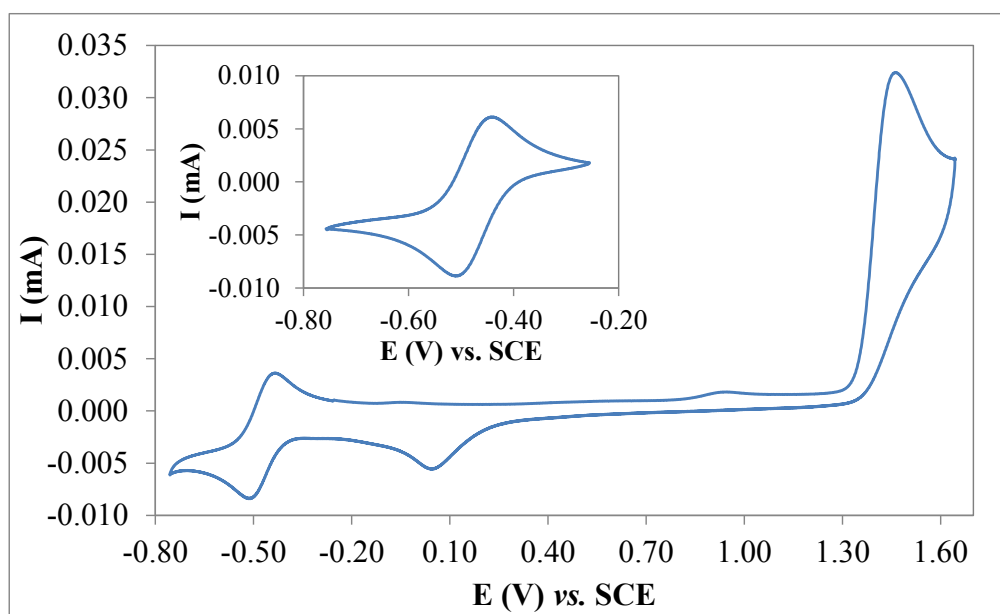

**Figure S5** Cyclic voltammogram (-0.80 - 1.60 V) for **3a** (CH<sub>3</sub>CN, 0.1 mol dm<sup>-3</sup> [(*n*-Bu)<sub>4</sub>N]PF<sub>6</sub>, 100 mV s<sup>-1</sup>). Inset shows the reversible reduction peak.

**Table S5** Cyclic Voltammetry data for compounds **3a,b** and **4a,b**.

| Redox Potential<br>(vs SCE) | <b>3a</b> | <b>3b</b> | <b>4a</b> | <b>4b</b> |
|-----------------------------|-----------|-----------|-----------|-----------|
| $E_{ox}$                    | +1.46     | +1.47     | +1.37     | +1.32     |
| $E_{1/2red}$                | -0.47     | -0.48     | -0.55     | -0.54     |

## X-Ray structure of complex 7

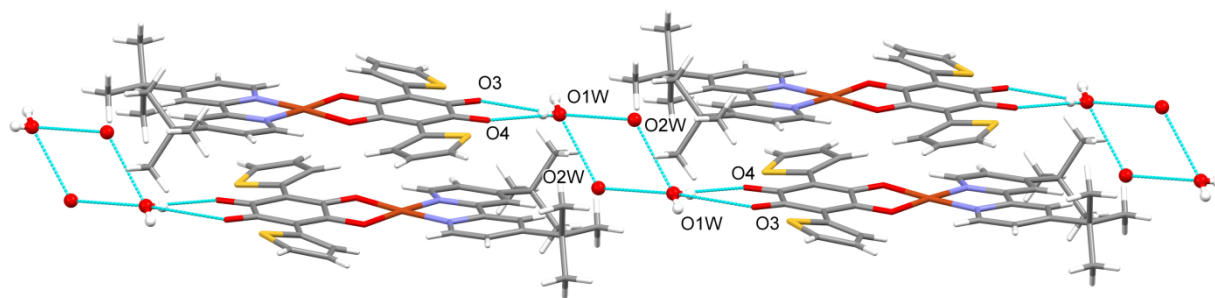

**Figure S6** Hydrogen bonding intermolecular interactions between crystallization water molecules and pairs of metal complexes. (Å): O3...O1w 3.04, O4...O1w 2.79, O1w...O2w 2.84, O1w...O2w 2.86.

# <sup>1</sup>H and <sup>13</sup>C NMR Spectra

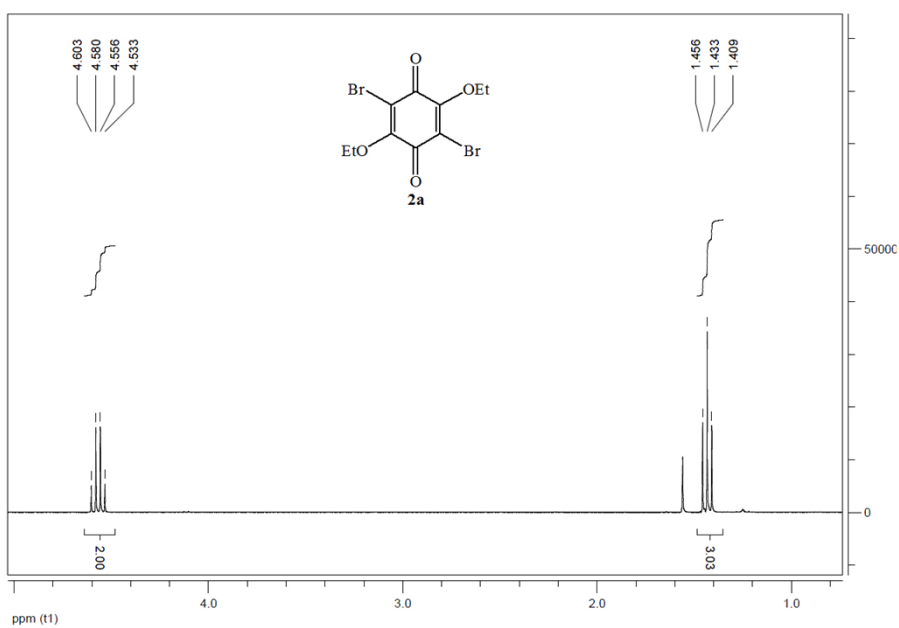

Figure S7 <sup>1</sup>H-NMR Spectrum of **2a**.

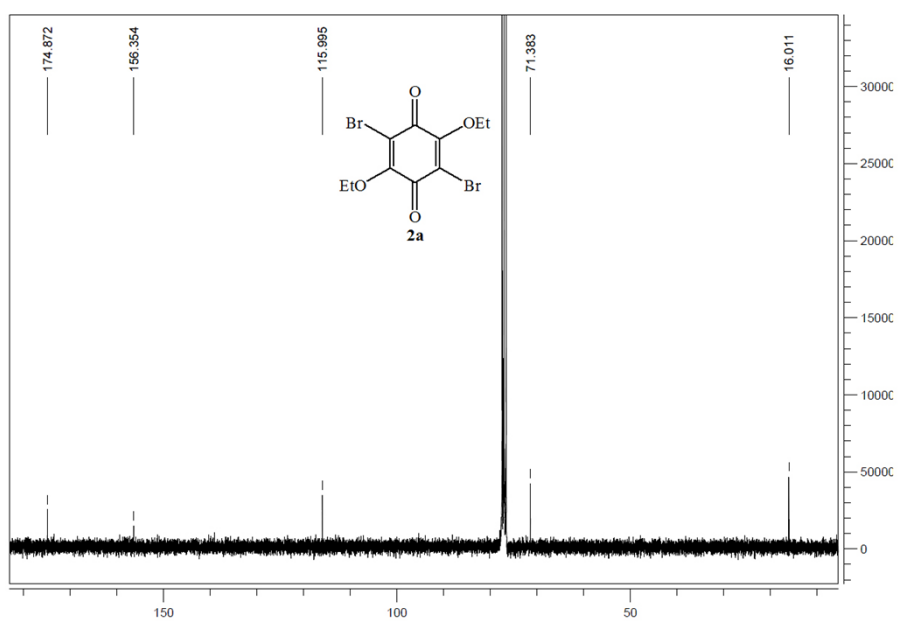

Figure S8 <sup>13</sup>C-NMR Spectrum of **2a**.

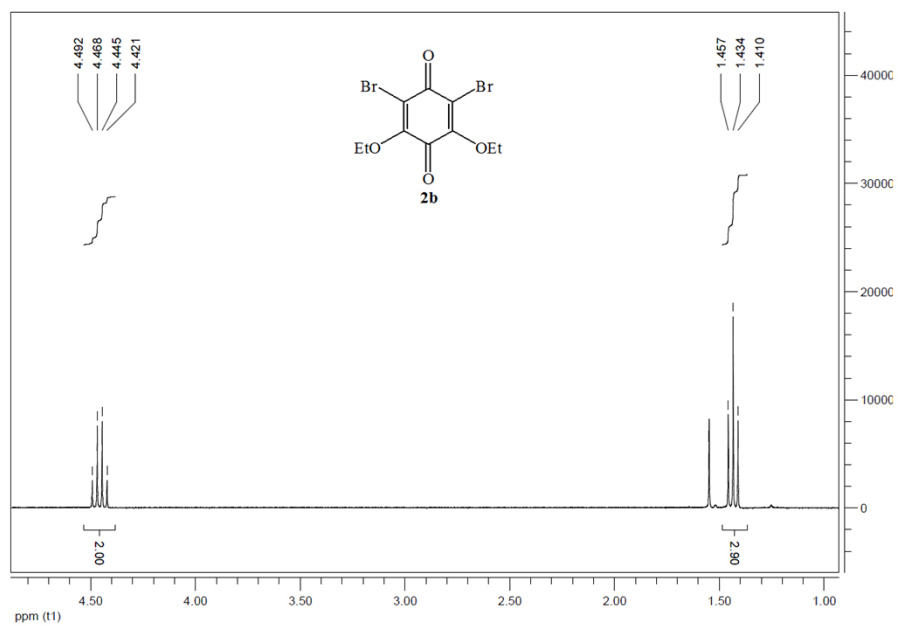

Figure S9  $^1\text{H-NMR}$  Spectrum of **2b**.

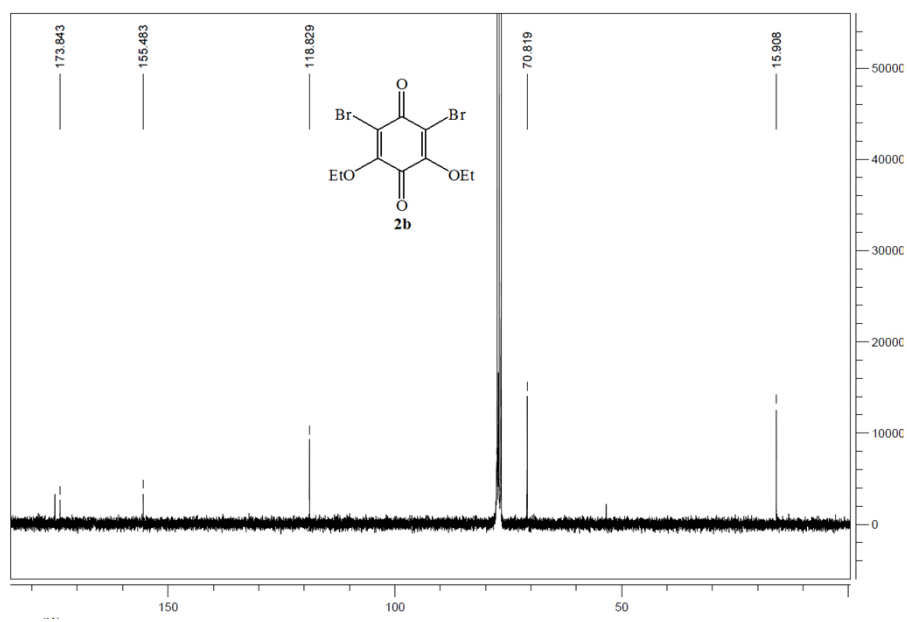

Figure S10  $^{13}\text{C-NMR}$  Spectrum of **2b**.

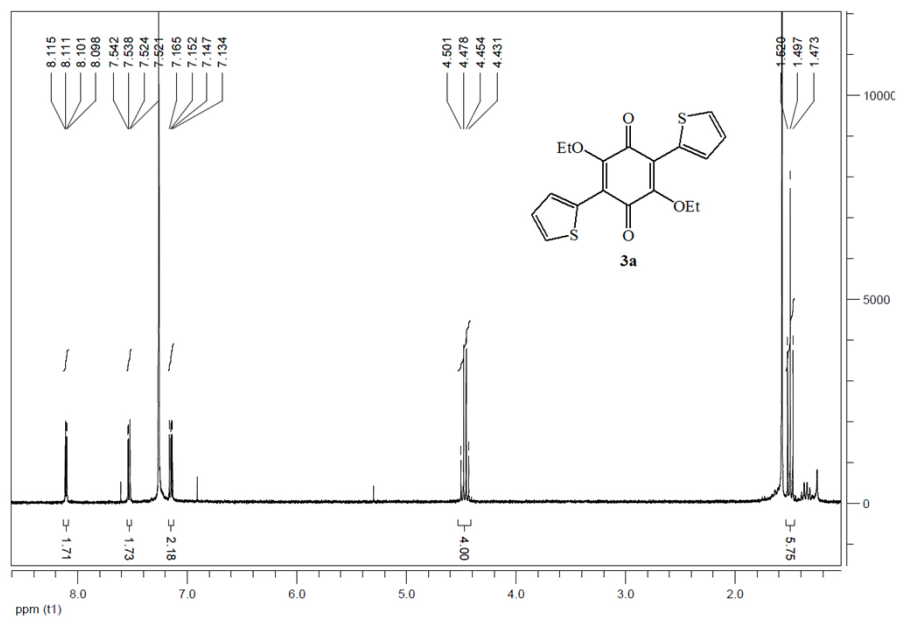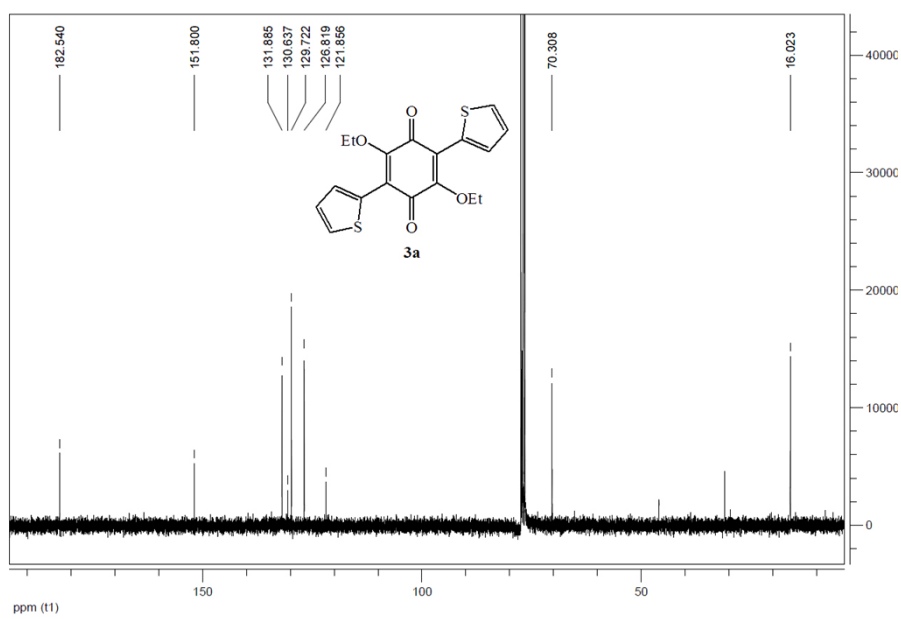

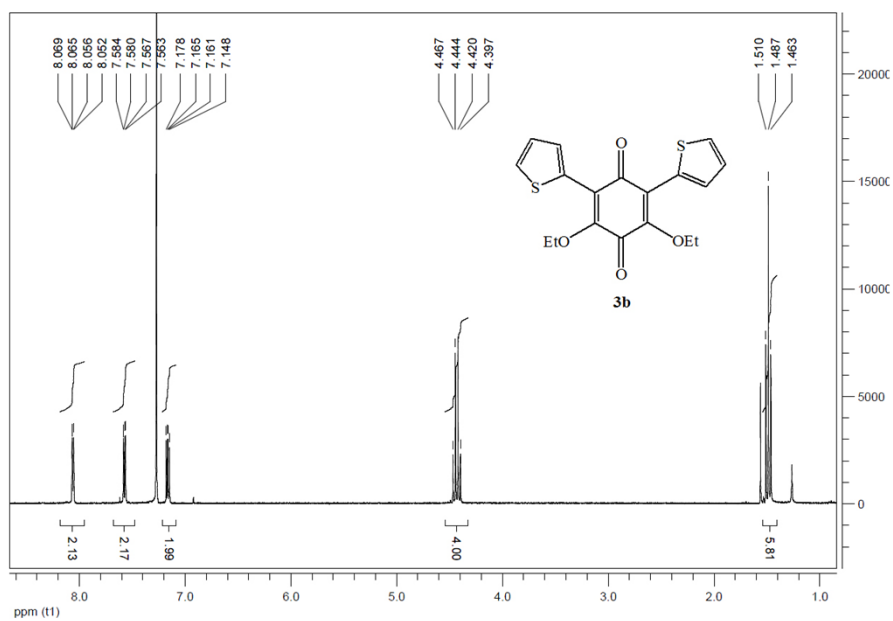

**Figure S13**  $^1\text{H-NMR}$  Spectrum of **3b**.

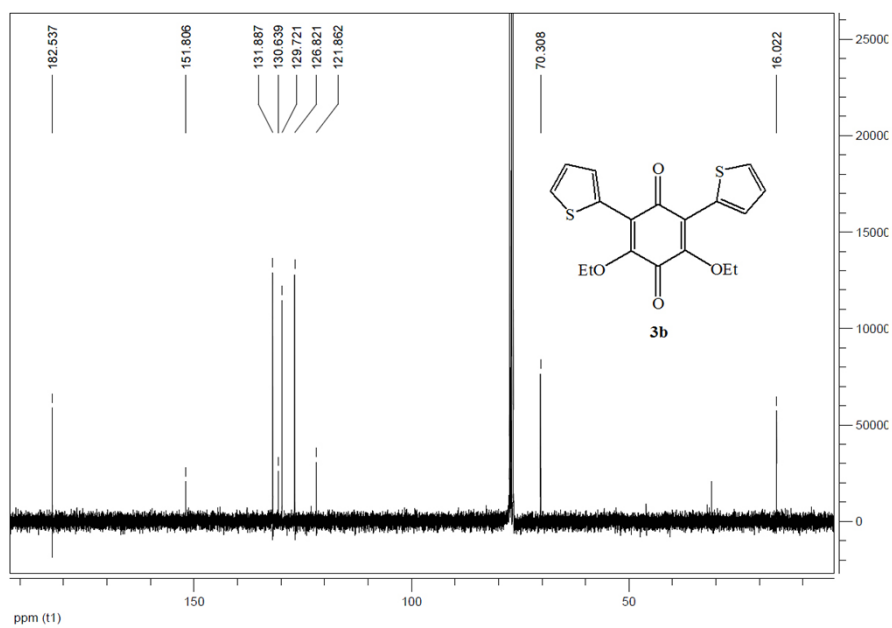

**Figure S14**  $^{13}\text{C-NMR}$  Spectrum of **3b**.



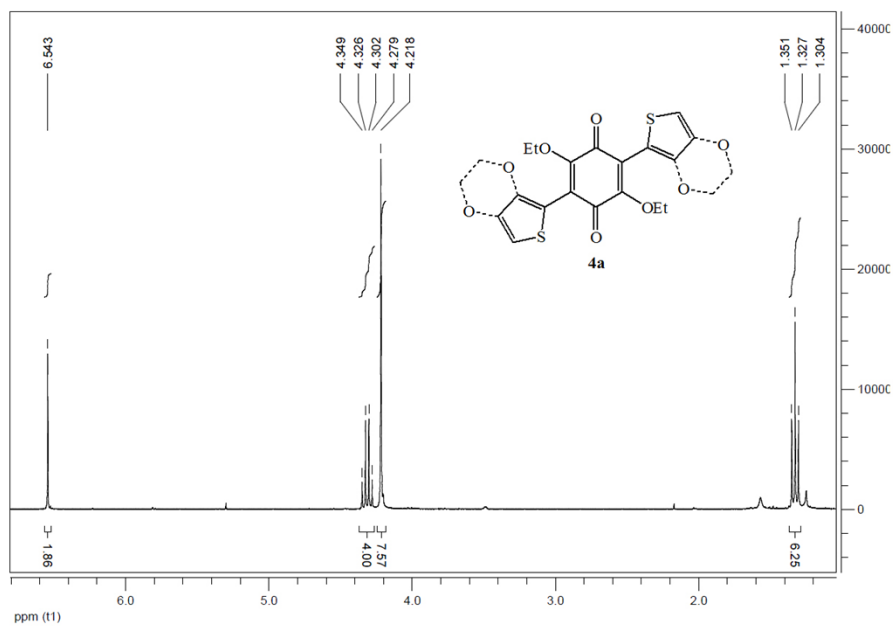

**Figure S15** <sup>1</sup>H-NMR Spectrum of **4a**.

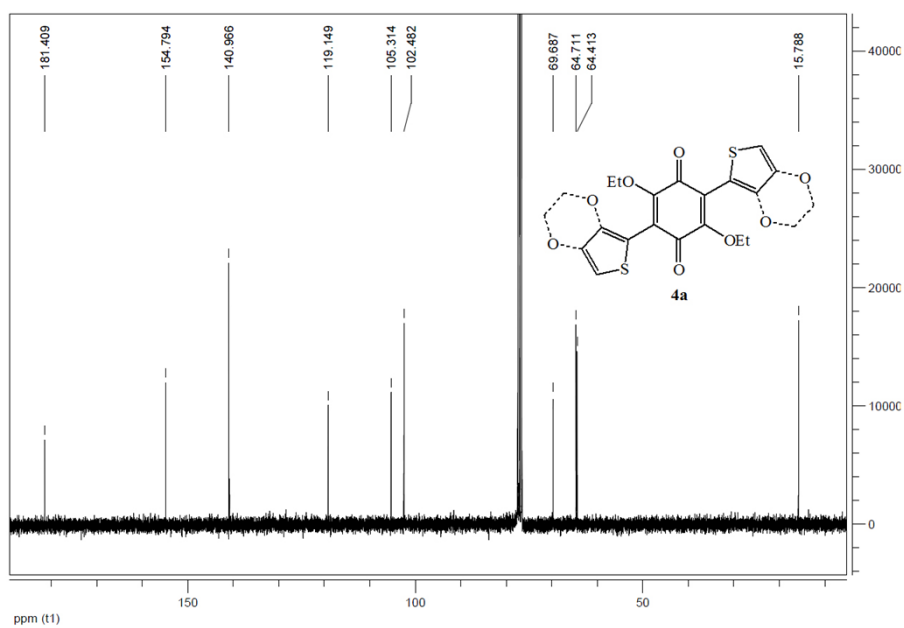

**Figure S16** <sup>13</sup>C-NMR Spectrum of **4a**.

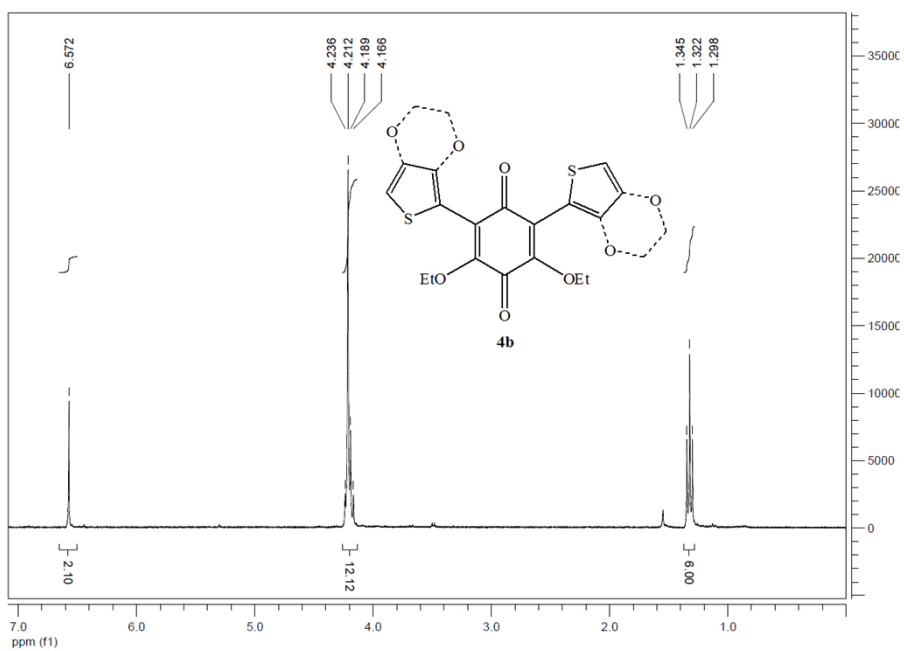

Figure S17 <sup>1</sup>H-NMR Spectrum of **4b**.

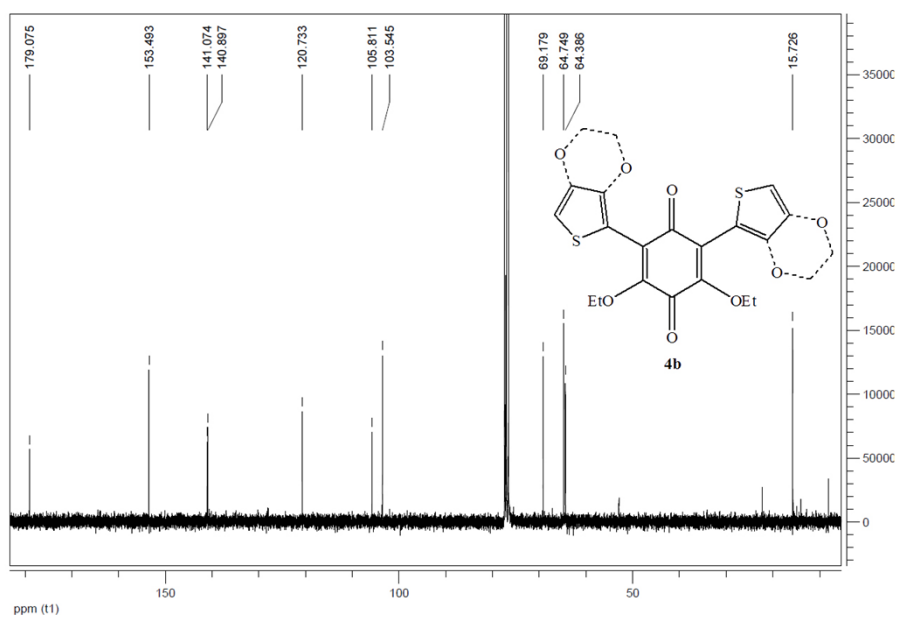

Figure S18 <sup>13</sup>C-NMR Spectrum of **4b**.

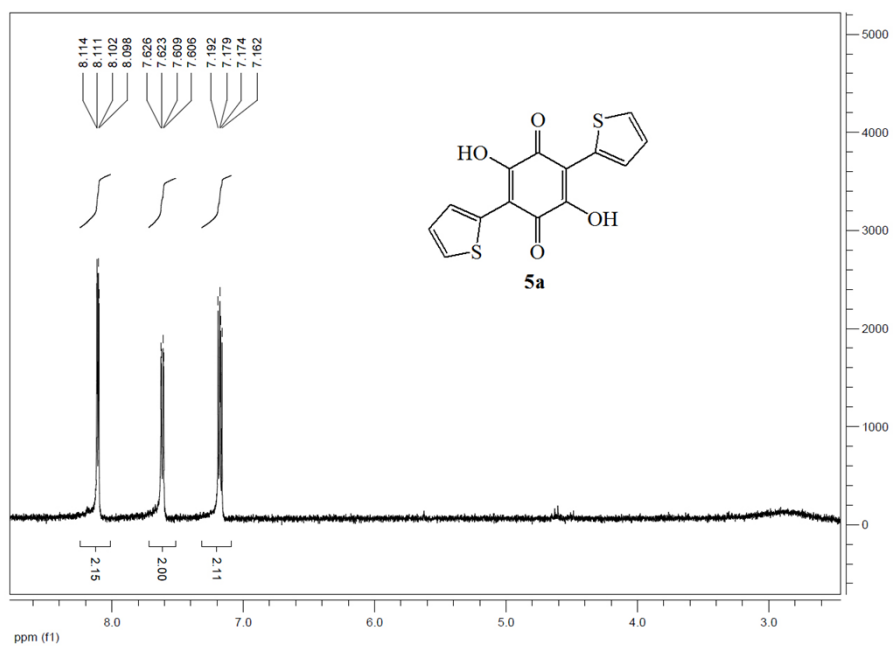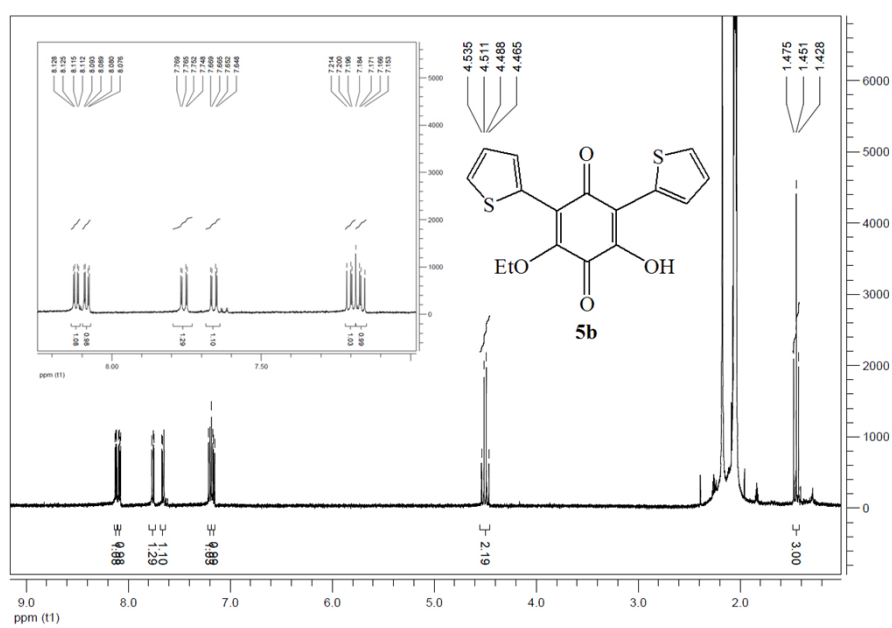

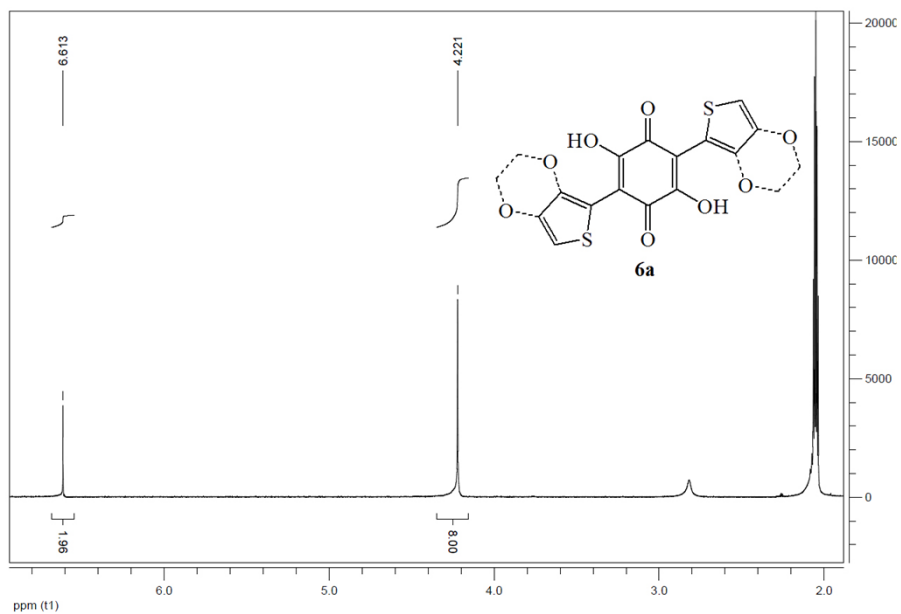

Figure S21  $^1\text{H-NMR}$  Spectrum of **6a**.

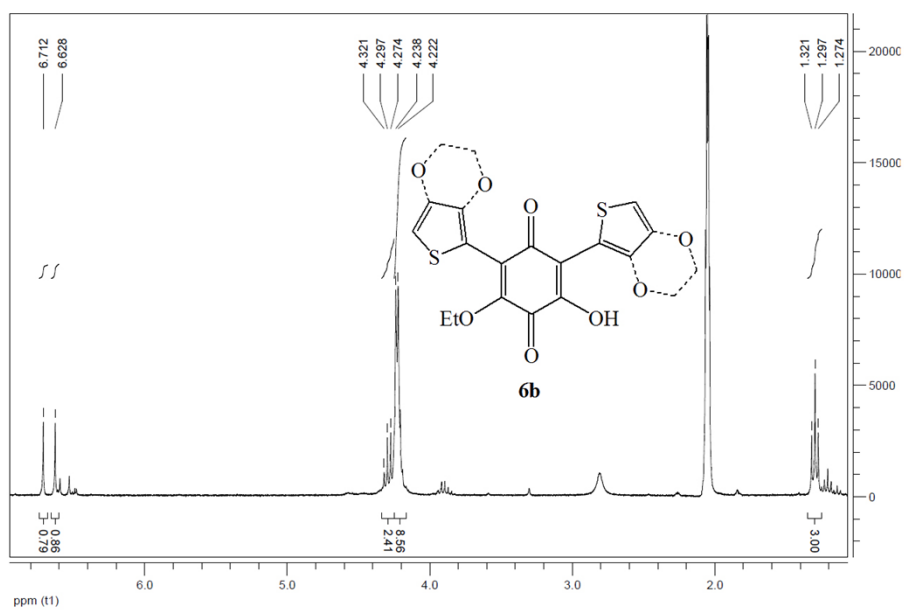

Figure S22  $^1\text{H-NMR}$  Spectrum of **6b**.
